# Supplementary material for: Phosphite-oxazole/imidazoleligands in asymmetric intermolecular Heck reaction
Source: Royal Society of Chemistry journal article supplement (doi:10.1039/c0ob00656d), 2010-12-13

## Supporting Information

### Phosphite-oxazole/imidazole Ligands in Asymmetric Intermolecular Heck Reaction.

*Javier Mazuela,<sup>a</sup> Paivi Tolstoy,<sup>b</sup> Oscar Pàmies,<sup>a,\*</sup> Pher G. Andersson<sup>b,\*</sup> and  
Montserrat Diéguez<sup>a,\*</sup>*

#### Contents:

|                                                                                   |   |
|-----------------------------------------------------------------------------------|---|
| 1. Profiles of the microwave experiments                                          | 2 |
| 2. <sup>1</sup> H and <sup>13</sup> C NMR of compounds <b>L5a-c</b> and <b>L7</b> | 4 |

## 1. Profiles for the microwave experiments

Examples of the temperature, power and pressure vs time profiles for the microwave experiments are included.

Table 3, entry 3

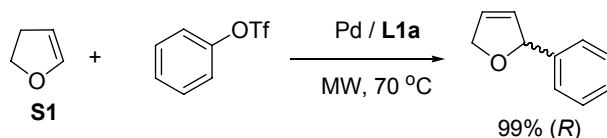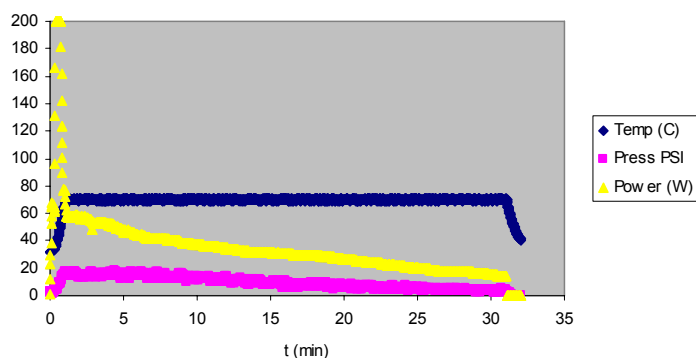

Table 3, entry 8

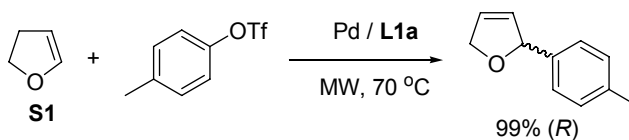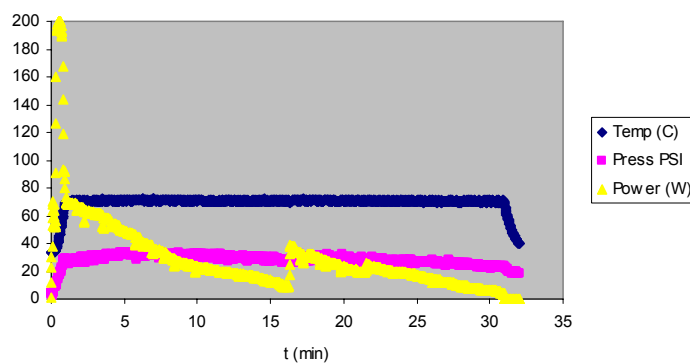

Table 3, entry 9

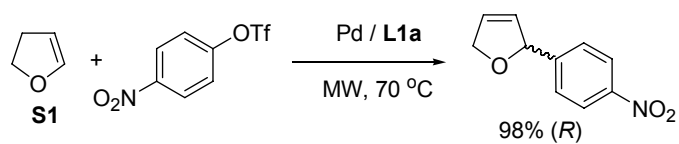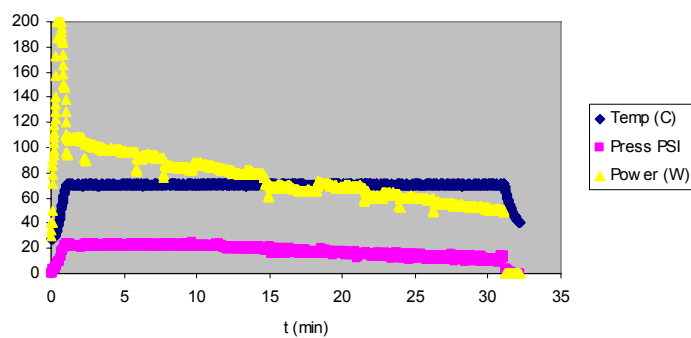

Table 3, entry 10

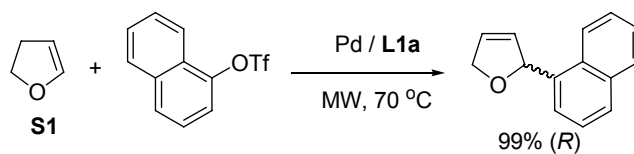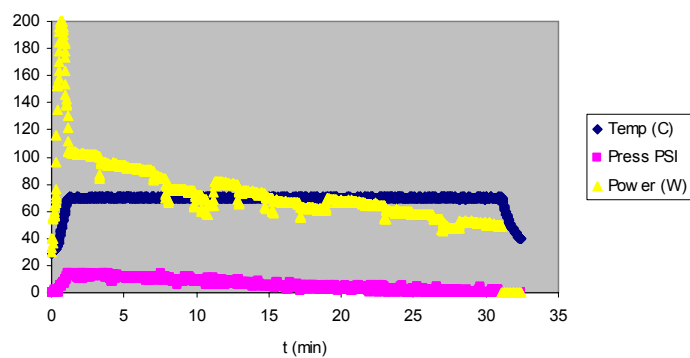

Table 3, entry 11

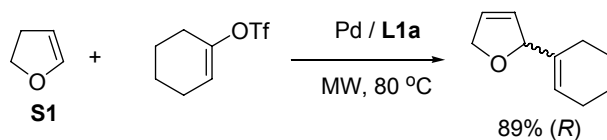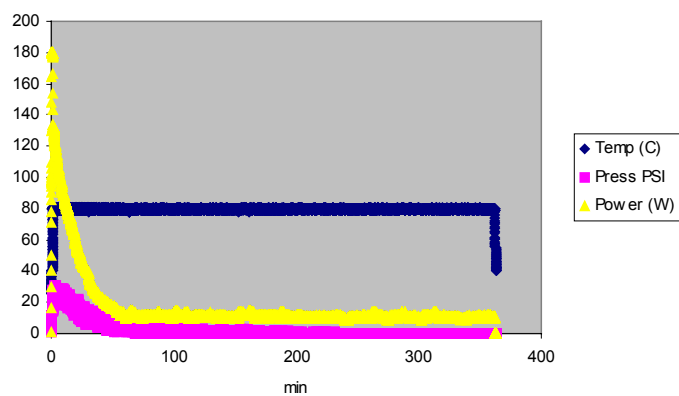

## 2. $^1\text{H}$ and $^{13}\text{C}$ NMR of compounds L5a-c and L7

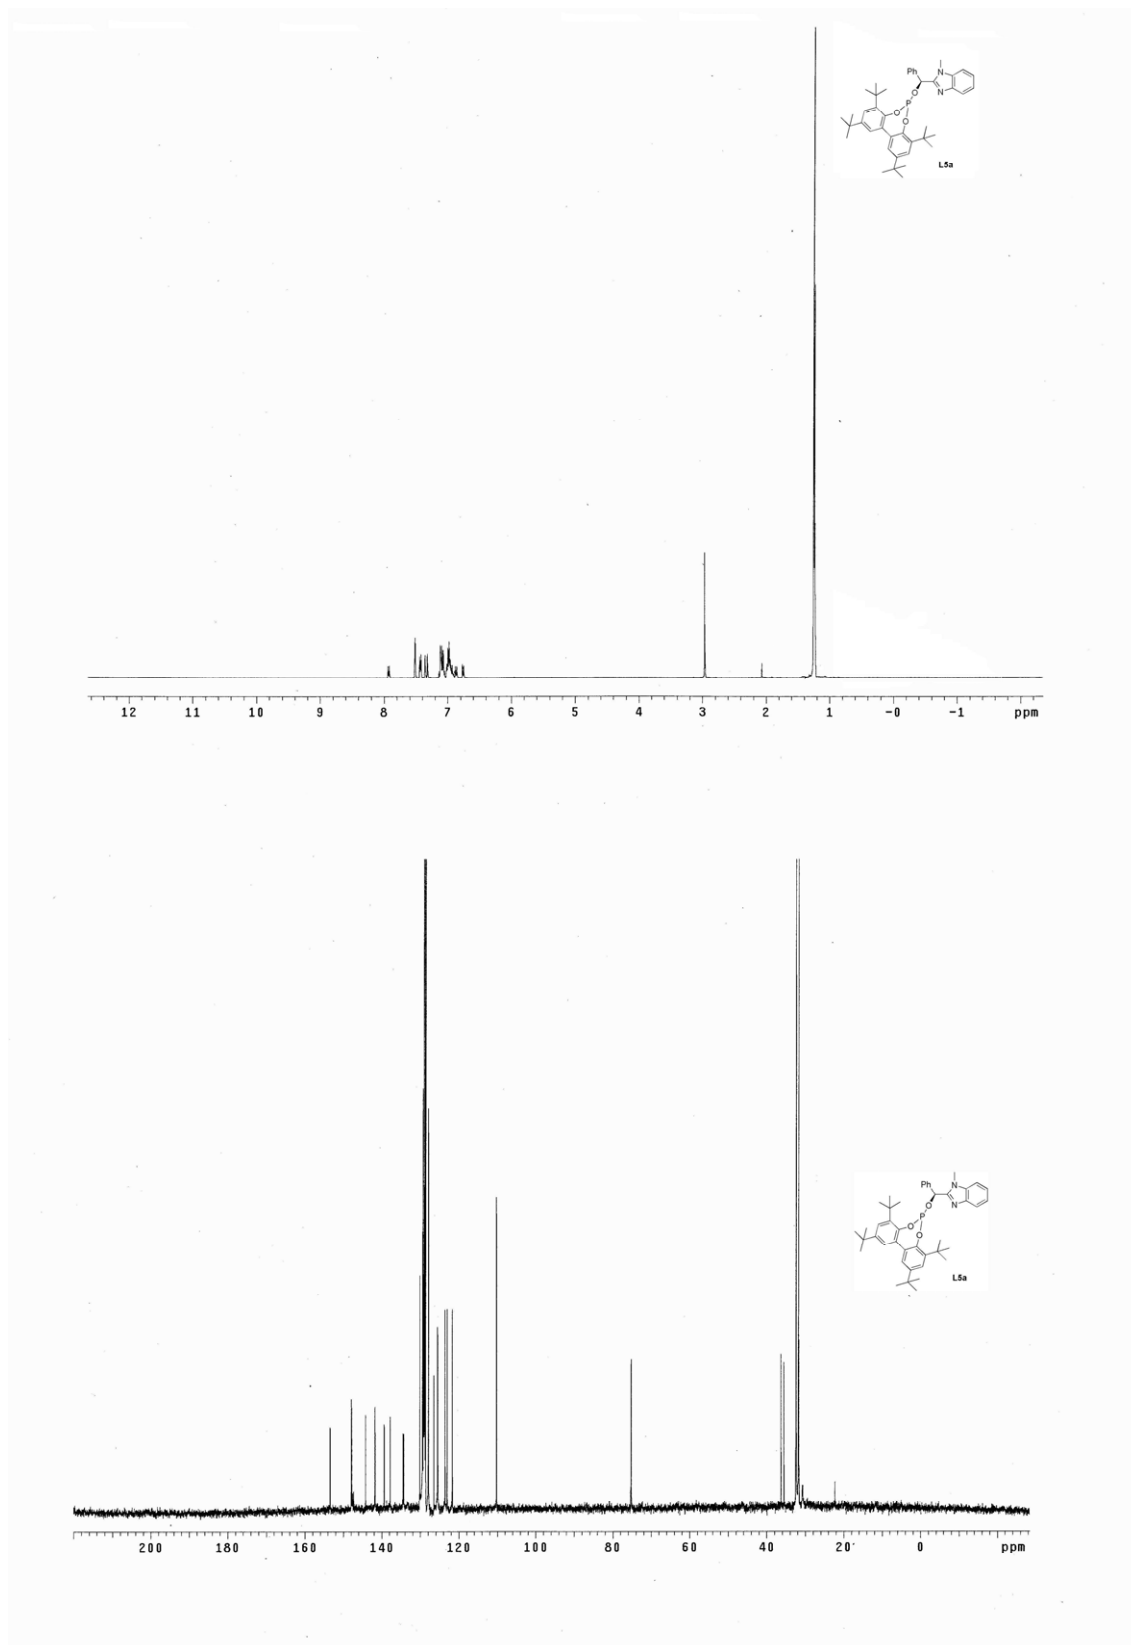

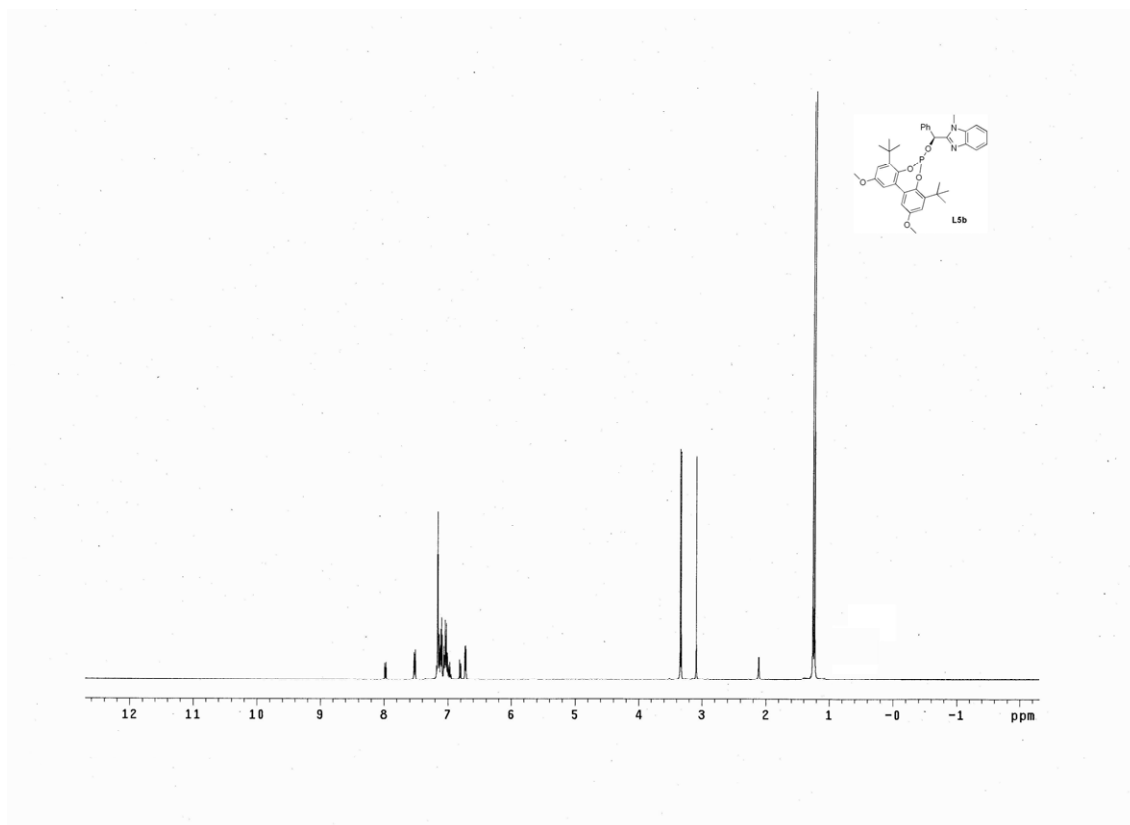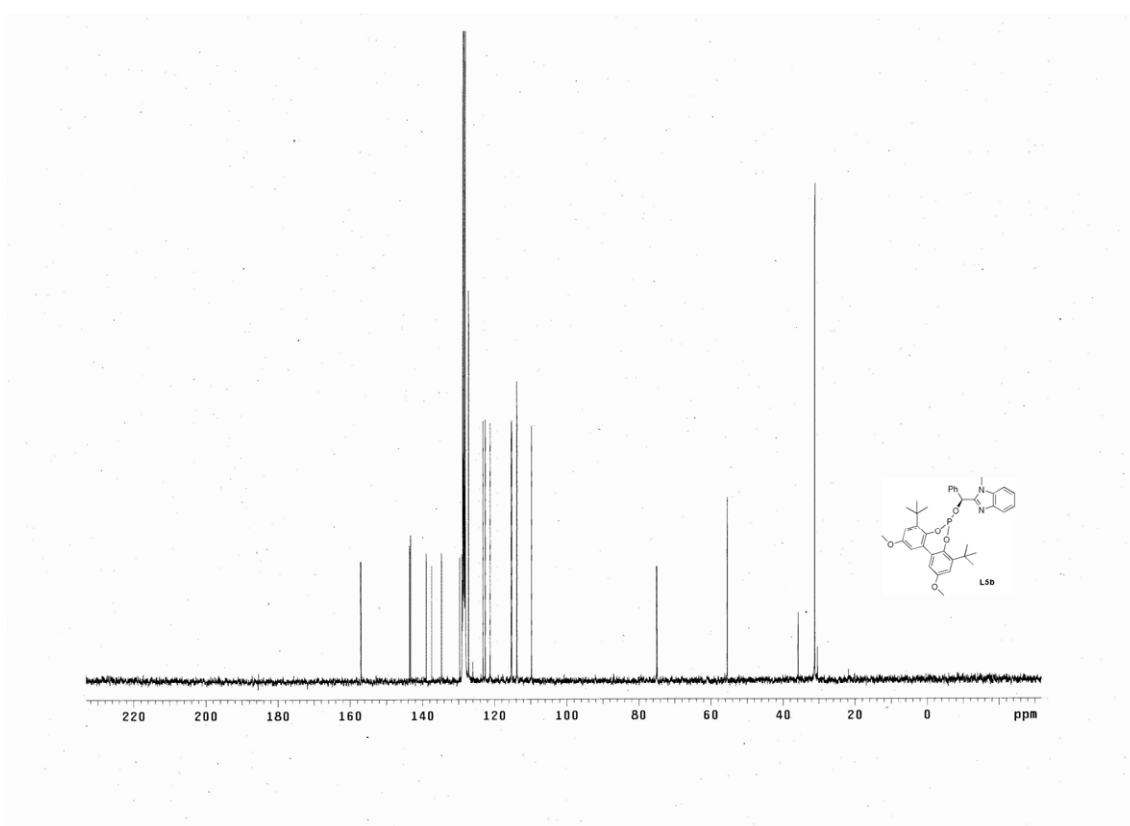

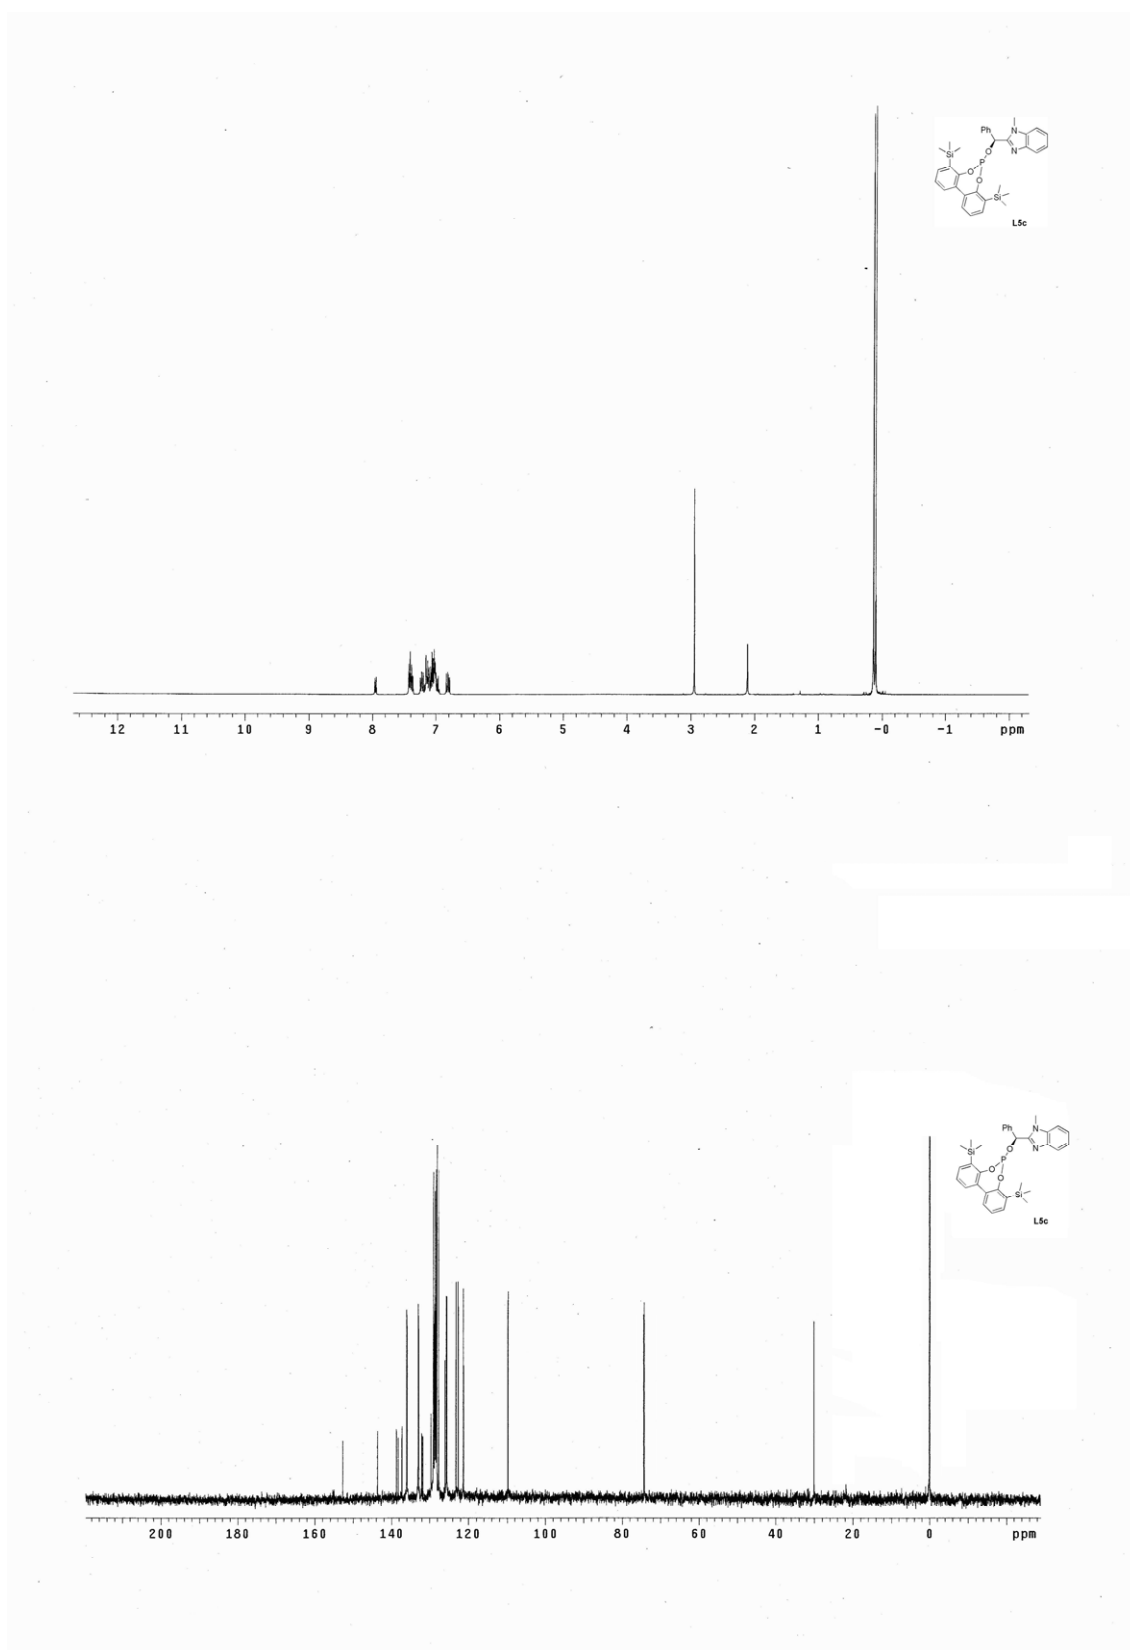

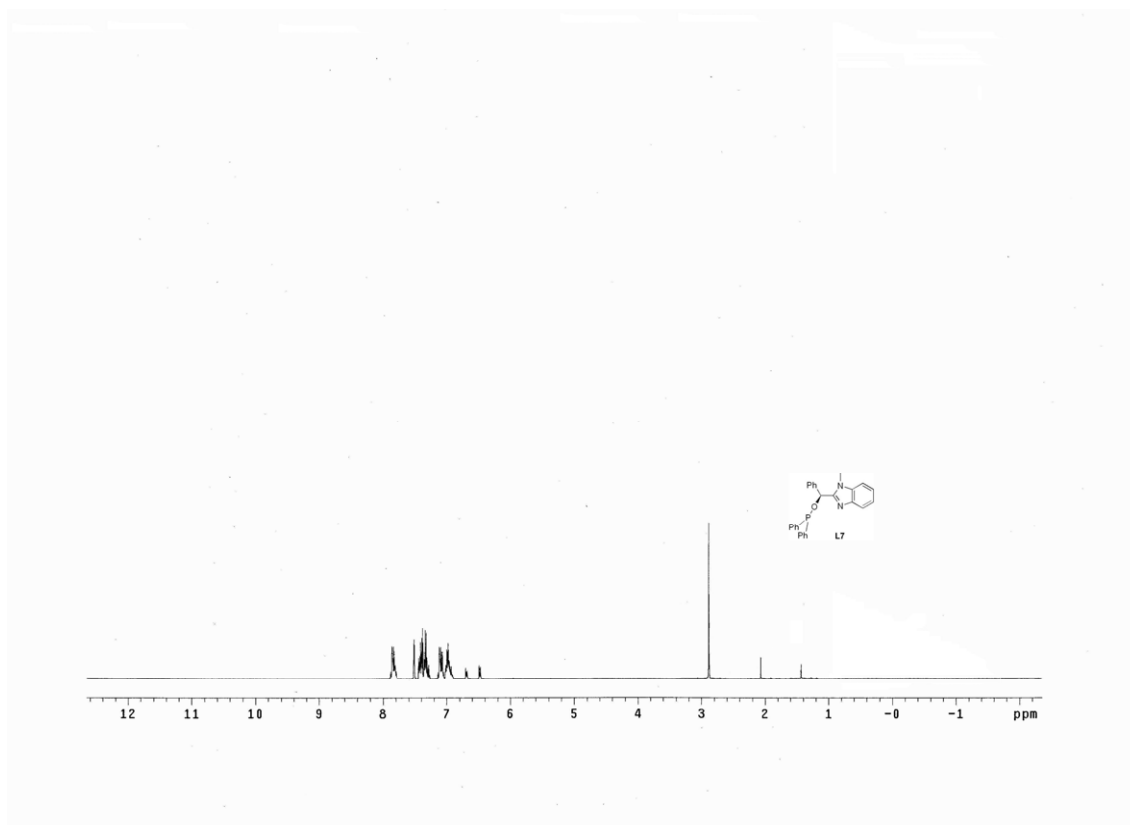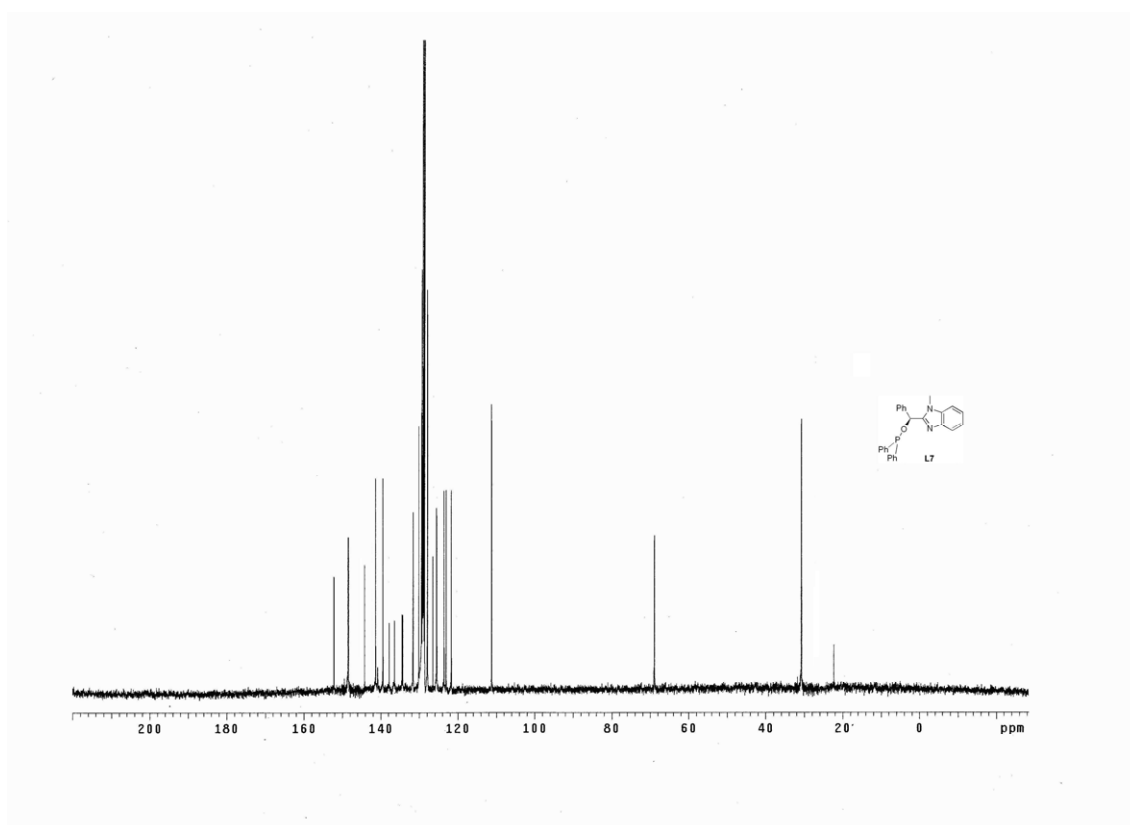

Supplement: c0ob00656d.pdf [file c0ob00656d.pdf]
